# Supplementary material for: Genome-wide detection of conserved stage-specific RNA editing events for nuclear genes in the Plasmodium falciparum 3D7 malaria parasite
Source: Research Square preprint supplement (doi:10.21203/rs.3.rs-7233611/v1), 2025-07-31
Supplement: Supplementary file 1 [file 90058e02e0d2e5a5486fcab1.docx]

**Command line**

**##** Quality control of the data

## trim-galore

trim_galore -q 25 --paired_1.fastq.gz_2.fastq.gz

**##** Alignment

cd /path/to

for ID in B1S2 B1S3 B1S4 B1S5 B2S2 B2S3 B2S4 B2S5 B3S2 B3S3 B3S4 B3S5;do

mkdir -p ${ID}

STAR \

--genomeDir / path/to /reference genome \

--runThreadN 10 \

--outFileNamePrefix ${ID}/ \

--outSAMtype BAM SortedByCoordinate \

-- twopassMode Basic \

--readFilesCommand zcat \

--readFilesIn ${ID}_1_val_1.fq.gz ${ID}_2_val_2.fq.gz &

done

**##**samtools index

samtools index ‘prefix.Aligned.sortedByCoord.out.bam'

*##* ***deduplicate*** *RNAseq BAM files* samtools collate -o RNA.col.bam Aligned.sortedByCoord.out.bam

samtools fixmate -m RNA.col.bam RNA.col.fx.bam

samtools sort -o RNA.col.fx.st.bam RNA.col.fx.bam

samtools markdup -r RNA.col.fx.st.bam RNA.dedup.bam

*##* **RNA variation detection on deduplicated RNAseq data**

$ python /path/to/reditools2.0/src/cineca/reditools.py -H \  -r /path/to/referance/genome.fa \  -o /path/to/dedup_SNV.reditools2.txt \  -f /path/to/ RNA.dedup.bam

**## command for REDItoolDenovo.py**

REDItoolDenovo.py -i /prefix/RNA.dedup.bam -o /prefix/REDItoolDenovo_$prefix/referance/genome.fa-c 10 -q 30 -m 255 -s 2 -g 2 -u -n 0.1 -W -p -v 5 -E -T 5-5 -d -e -t 16

REDItoolDenovo.py -i /prefix/RNA.dedup.bam -o /prefix/REDItoolDenovo -f /prefix/referance.fa

**## Grep command for screening the conserved RNA editing sites**

grep -f filter1 /prefix/dedup_SNV.reditools2.txt>/home/prefix/dedup_SNV.reditools2.txt

filter1= RNA variation table output of reditools2 from reference RNA seq

dedup_SNV.reditools2.txt=table output of reditools2

dedup_SNV.reditools2.txt=Filtered table with different RNA editing events and sites

**## To count the editing sites**

**~**$ wc -l /path/to/dedup_SNV.reditools2.txt

dedup_SNV.reditools2.txt=Filtered table with different RNA editing events and sites
